# Supplementary material for: False-positive cardiac troponin I values due to macrotroponin in healthy athletes after COVID-19
Source: publisher site journal article supplement (doi:10.1515/cclm-2025-0427), 2025-06-17
Supplement: Supplementary file 1 [file j_cclm-2025-0427_suppl_001.docx]

**Supplementals**

Original Research

False-positive Cardiac Troponin I Values due to Macrotroponin in Healthy Athletes after COVID-19

Angelika Hammerer-Lercher1,2*,Christine K. Kissel3,4*, Saara Wittfooth5, Helea Junes5, Emel Kaplan6, Gabrielle Huré6, Alessandra Sanzone6, Peter Neyer7, Luca Bernasconi7, Robert Manka8, Patrik Noack3, Daniëlle Hof9, Ola Hammarsten10,11#, Christian Mueller6#

1Institute of Laboratory Medicine, Cantonal Hospital Aarau AG, Aarau, Switzerland and University of Bern, Bern, Switzerland

2Central Medical Laboratories, Feldkirch, Austria

3Medbase Sports Medical Center Abtwil, Swiss Olympic Medical Center, Wiesenbachstrasse 5, 9030 Abtwil, Switzerland

4Cardiology Clinic Stadelhofen, Goethestrasse 20, 8001 Zurich, Switzerland

5Biotechnology Unit, Department of Life Technologies, University Turku, Kiinamyllynkatu 10, 20520 Turku, Finland

6Cardiovascular Research Institute Basel (CRIB) and Department of Cardiology, University Hospital Basel, Petersgraben 4, 4031 Basel, Switzerland

7Institute of Laboratory Medicine, Cantonal Hospital Aarau AG, Aarau, Switzerland

8Diagnostic and Interventional Radiology, University Hospital Zurich, University of Zurich, Zurich, Switzerland

9Unilabs, Ringstrasse 12, 8600 Dübendorf, Switzerland

10Department of Laboratory Medicine, Institute of Biomedicine, University of Gothenburg SE-413 45 Gothenburg, Sweden

11Department of Clinical Chemistry, Sahlgrenska University Hospital, SE-413 45 Gothenburg, Sweden

**Further researchers contributed to the manuscript and should be listed as contributors in PubMed, they are also listed in the acknowledgement:**

Franja Dugar5, Vanessa Thommen5, Rebekka Odermatt5

5Cardiovascular Research Institute Basel (CRIB) and Department of Cardiology, University Hospital Basel, Petersgraben 4, 4031 Basel, Switzerland

**Contributions as first and last authors:**

- Angelika Hammerer-Lercher and Christine K. Kissel contributed equally to this work and share first authorship.
- Ola Hammarsten and Christian Mueller contributed equally to this work and share last authorship.

**Supplemental Methods**

**Protein G spin column**

We optimized maximum IgG recovery of this method by adjusting the elution buffer composition. By increasing pH and decreasing glycine concentration the IgG recovery increased while total protein recovery remained around 100%. Therefore, the buffer (0.1 mmol/L Glycine, pH 3) with the weakest composition still within the protein G gel manufacturer's specifications was chosen to achieve maximum sensitivity. The protein G column treated samples were measured with hs-cTnI (Atellica Siemens or Alinity Abbott) for macrotroponin I determination and in one case additionally with hs-cTnT (Elecsys Roche) for macrotroponin T investigation.

**Anti-troponin autoantibody immunoassay**

Briefly, for the anti-troponin autoantibody immunoassay method diluted samples were each divided into “background sample” and “analysis sample” tubes. The sample in the “analysis sample” tube was additionally spiked with cardiac troponin complex (30 µg/L; Hytest Ltd, Turku, Finland). After an incubation step, capturing of any cTnI in either background or analysis sample tube was done by biotinylated cTnI-specific monoclonal antibodies 8I7 (Fortis Life Sciences, Waltham, USA) and M155 (Hytest Ltd) immobilized on streptavidin-coated wells (Uniogen Oy, Turku, Finland). Europium chelate-labeled anti-human IgG antibody 3D3 (Hytest Ltd) was used to detect any cardiac troponin complex targeting autoantibodies in the samples. Autoantibody-positivity was deemed, if a t-test comparing triplicate analyses of “analysis sample” and “background sample” resulted in a p-value <0.05 and the mean signal of “analysis sample” was >1000 counts above the mean signal of “background sample”. The use of background samples is essential as human samples produce significant and highly variable nonspecific background signals.

**Power Calculation**

We estimated a 3% incidence of false-positive hs-cTn increases during the pandemic. In order to detect approximately 20 athletes with increased values, 700 athletes were calculated to be included with a 80% power (α=0.05). We reached the target number of increased hs-cTn already after 35 inclusions and thus terminated the recruitment earlier).

**Supplemental results**

**Additional population characteristics**

Of the 35 included athletes four had known secondary diagnoses that were not impacting this study of macrotroponin investigation. These were a 25 years old male with diabetes mellitus type 1, a 75 years old male with atherosclerosis and hypercholesterolemia, a 48 years old female with vestibular migraine and a 26 years old female with heterozygote factor V Leiden mutation and a history of pulmonary embolism on both sides (6 years before study inclusion).

**Supplemental Table 1: High-sensitivity cardiac troponin assay characteristics according to package inserts of assays.** Quantitative values are in nanograms per liter (ng/L).

| Assay | Instrument | Method | LOB | LOD | LOQ | Cut-off (female) | Cut-off (male) |
| --- | --- | --- | --- | --- | --- | --- | --- |
| hs-TnT | Cobas (Roche Diagnostics) | ECLIA | 2.5 | 3.0 | 13 | 9.0 | 16.8 |
| hs-cTnI | Atellica Solution (Siemens Healthineers) | CLIA | 0.5 | 1.6 | 2.5 | 34.1 | 53.5 |
| hs-cTnI | Alinity i (Abbott Diagnostics) | CMIA | NP | NP | 10 | 15.6 | 34.2 |
| hs-cTnI | Access 2 (Beckman Coulter) | CLIA | 1.7 | 2.3 | 2.3 | 11.6 | 19.8 |
| Abbreviations: ECLIA, electrochemiluminescence immunoassay; CLIA, chemiluminescence immunoassay; CMIA, chemiluminescence microparticle immunoassay; NP, not provided ; LOB, limit of blank; LoD, limit of detection; LOQ, limit of quantification. | | | | | | | |

**Supplemental Table 2: Additional characteristics of all athletes in the study group as well as according to the presence or absence of macrotroponin.** Data were not consistently available for all athletes; therefore, the number of cases is provided in additional parentheses. The p-values were calculated between the groups with and without macrotroponin.

|  | Overall  (n=35) | Without macrotroponin (n=19) | With macrotroponin (n=16) | p-value  (with vs without macrotroponin) |
| --- | --- | --- | --- | --- |
|  |  |  |  |  |
|  |  |  |  |  |
| Age (years) | 24 (20; 38) | 26 (22; 48) | 22 (20; 26) | 0.088 |
| Females in %) | 54 | 47 | 63 | n.s. |
| CRP mg/L | 5.0 (4.9; 5.0) (n=23) | 5.0 (4.9; 5.0) (n=12) | 5.0 (1.0; 5.0) (n=11) | n.s. |
| Alkaline phosphatase (U/L) | 60 (53; 84) (n=21) | 57 (53; 77) (n=12) | 65 (49;94) (n=9) | n.s. |
| ALT (U/L) | 16 (15; 21) (n=22) | 16 (15; 21) (n=12) | 17 (14; 22) (n=10) | n.s. |
| AST (U/L) | 24 (21; 29) (n=21) | 24 (21; 28) (n=12) | 25 (19; 29) (n=9) | n.s. |
| GGT (U/L) | 17 (15; 24) (n=21) | 23 (17; 30) (n=12) | 15 (13; 16) (n=9) | 0.004 |
| Creatine kinase (U/L) | 129 (99; 196) (n=20) | 124 (98; 202) (n=11) | 133 (99; 207) (n=9) | n.s. |
| Sodium (mmol/L) | 143 (142; 144) (n=22) | 143 (142; 145) (n=13) | 143 (142; 144) (n=9) | n.s. |
| Potassium (mmol/L) | 4.1 (3.8; 4.2) (n=22) | 4.1 (4.0; 4.5) (n=13) | 3.8 (3.6; 4.1) (n=9) | 0.021 |
| Leucocytes (G/L) | 5.5 (4.7; 6.8) (n=24) | 5.5 (5.2; 6.3) (n=14) | 5.5 (4.4; 9.2) (n=10) | n.s. |
| Thrombocytes (G/L) | 264 (2231; 316) (n=24) | 264 (217; 298) (n=14) | 268 (242; 326) (n=10) | n.s. |
| Erythrocytes (T/L) | 4.8 (4.4; 5.1) (n=23) | 5.0 (4.3; 5.1) (n=13) | 4.8 (4.5; 5.0) (n=10) | n.s. |
| Hematocrit (%) | 41.8 (40.0; 44.3) (n=24) | 42.9 (39.7; 44.5) (n=14) | 40.6 (39.8; 44.0) (n=10) | n.s. |
| Hemoglobin (g/dL) | 14.2 (13.1; 15.1) (n=24) | 14.3 (13.1; 15.0) (n=14) | 14.1 (13.0; 15.2) (n=10) | n.s. |
| MCH (pg) | 29.5 (29.0; 30.2) (n=24) | 29.6 (29.3; 30.6) (n=14) | 29.2 (28.8; 29.5) (n=10) | 0.074 |
| MCV (fL) | 88 (85; 90) (n=23) | 88 (86; 93) (n=13) | 87 (83; 90) (n=10) | n.s. |
| MCHC (g/dL) | 33.4 (32.9; 33.9) (n=22) | 33.4 (32.9; 33.7) (n=14) | 33.5 (32.3; 35.0) (n=8) | n.s. |
| RDW % | 12.3 (11.9; 12.7) (n=24) | 12.5 (11.9; 12.8) (n=14) | 12.1 (11.8: 12.3) (n=10) | n.s. |

Values as median (25th; 75th percentile); n.a., due to insufficient data(n<5).

Abbreviations: n.s., not significant; ALT, alanine aminotransferase; AST, aspartate aminotransferase; GGT, gamma-glutamyltransferase; MCH, mean corpuscular hemoglobin; MCV, mean corpuscular volume; MCHC, mean corpuscular hemoglobin concentration; RDW, red cell distribution width.

**Supplemental Table 3: Additional electrocardiogram and imaging information of athletes.** Depending on clinical symptoms and laboratory parameter findings further imaging investigations were performed. Numbers indicate athletes per group.

|  | Overall  (n=35) | Without macrotroponin (n=19) | With macrotroponin (n=16) |
| --- | --- | --- | --- |
| Electrocardiogram | 34 / 35 | 19 / 19 | 15 / 16 |
| Atrioventricular block | 1 / 33 | 0 / 19 | 1 / 14 |
| Incomplete right bundle block | 2 / 32 | 0 / 19 | 2 / 13 |
| Non-significant ST-depression | 1 / 34 | 0 / 19 | 1 / 15 |
| Left ventricular hypertrophy | 22 / 34 | 11 / 19 | 11 / 15 |
| Echocardiography | 21 / 35 | 8 / 19 | 13 / 16 |
| Wall motion with hypokinesia | 2 / 21 | 1 / 8 | 1 / 13 |
| Left atrial volume |  |  |  |
| Normal | 10 / 15 | 3 / 6 | 7 / 9 |
| Dilated | 5 / 15 | 3 / 6 | 2 / 9 |
| Cardiac magnetic resonance | 14 / 35 | 4 / 19 | 10 / 16 |
| Hypertrophy | 0 / 14 | 0 / 4 | 0 / 10 |
| Systolic ejection fraction |  |  |  |
| normal | 8 / 13 | 1 / 4 | 7 / 9 |
|  |  |  |  |
| Details on 5 remainders |  | + normal LV function; minimally impaired RV function  +LV mildly impaired systolic function; normal RV and systolic function  + indexed dilated LV with low normal systolic function; indexed marginally dilated RV with normal systolic function | + Dilated LV with normal systolic function; dilated RV with impaired systolic function  + dilated LV with low normal systolic function; normal RV and systolic function |
| Normal wall motion | 13 / 13 | 4 / 4 | 9 / 9 |
| Late Gadolinium enhancement | 0 / 13 | 0 / 4 | 0 / 9  + T1 mapping of LV myocardium 1035 ms (normal: 989 ±28 ms). T2 mapping of LV myocardium 52 ms (normal: 48 ±3 ms). |

Numbers indicate athletes per group. Abbreviation: n, numbers; LV, left ventricle; RV, right ventricle.

**Supplemental Figure 1: Flowchart of macrotroponin allocation**

The flowchart illustrates the allocation of athletes into macrotroponin-negative and -positive groups. Athletes with all hs-cTn values below the sex-specific cut-off values were designated as macrotroponin-negative. Those with increased hs-cTn values in at least one assay underwent macrotroponin assessment by sucrose gradient ultracentrifugation.
